# Supplementary material for: Towards robust seasonal streamflow forecasts in mountainous catchments: impact of calibration metric selection in hydrological modeling
Source: Copernicus journal article supplement (doi:10.5194/hess-2023-116), 2023-05-24
Supplement: Supplementary file 1 [file hess-2023-116-supplement.pdf]

Supplement of

**Towards robust seasonal streamflow forecasts in mountainous catchments: impact of calibration metric selection in hydrological modeling**

Diego Araya et al.

**Table S1.** Catchment attributes. **ME:** Mean Elevation (m.a.s.l.), **A:** Area (km<sup>2</sup>), **FBCF:** Fraction of Basin Covered by Forest (%), **FBCBL:** Fraction of Basin Covered by Barren Land (%), **MAT:** Mean Annual Temperature (°C), **AI:** Aridity Index (-), **PS:** Precipitation Seasonality (-), **MAP:** Mean Annual Precipitation (mm), **PFS:** Precipitation Falling as Snow (%), **MAR:** Mean Annual Runoff (mm), **BI:** Baseflow Index (-), **IRV:** Interannual Runoff Variability (-).

| Catchment                       | ME   | A    | FBC  | FBCFL | MAT  | AI  | PS    | MAP  | PFS | MAR  | BI   | IRV  |
|---------------------------------|------|------|------|-------|------|-----|-------|------|-----|------|------|------|
| Pulido en Vertedero             | 3566 | 2022 | 0.0  | 63    | 6.3  | 7.0 | -0.96 | 126  | 36  | 20   | 0.83 | 0.45 |
| Toro antes de junta con la      | 3905 | 467  | 0.0  | 87    | 4.3  | 5.6 | -0.62 | 133  | 50  | 43   | 0.68 | 0.38 |
| La Laguna en Salida             | 4275 | 558  | 0.0  | 78    | 2.6  | 4.3 | 0.71  | 156  | 71  | 104  | 0.77 | 0.65 |
| Derecho en Alcohuz              | 3544 | 338  | 0.1  | 69    | 4.6  | 3.2 | -1.12 | 222  | 64  | 107  | 0.81 | 1.00 |
| Hurtado en Angostura            | 3724 | 672  | 0.1  | 66    | 3.9  | 2.4 | -1.04 | 251  | 70  | 128  | 0.86 | 0.81 |
| Rapel en Junta                  | 2661 | 821  | 0.6  | 34    | 8.7  | 3.0 | -1.05 | 313  | 12  | 71   | 0.67 | 1.30 |
| Grande en las Ramadas           | 3098 | 569  | 0.0  | 67    | 6.7  | 2.9 | -1.12 | 284  | 34  | 202  | 0.78 | 0.89 |
| Grande en Cuyano                | 2726 | 1287 | 0.2  | 49    | 8.8  | 3.6 | -1.21 | 277  | 8   | 147  | 0.75 | 0.96 |
| Choapa en Cuncumén              | 3142 | 1132 | 0.2  | 64    | 6.0  | 2.7 | -1.18 | 318  | 53  | 236  | 0.75 | 0.74 |
| Pedernal en Tajada              | 2454 | 81   | 0.1  | 27    | 9.6  | 2.8 | -1.25 | 355  | 3   | 89   | 0.65 | 1.06 |
| Sobrante en Piñadero            | 2610 | 241  | 0.2  | 40    | 8.3  | 2.3 | -1.21 | 397  | 13  | 90   | 0.78 | 1.15 |
| Alicahue en Colliguay           | 2403 | 348  | 0.2  | 37    | 9.1  | 2.5 | -1.18 | 391  | 7   | 94   | 0.78 | 1.06 |
| Aconcagua en Chacabuquito       | 3178 | 2113 | 0.3  | 66    | 5.3  | 1.9 | -1.16 | 390  | 52  | 448  | 0.76 | 0.52 |
| Pocuro en el Sifón              | 2006 | 181  | 0.2  | 20    | 11.1 | 2.5 | -1.22 | 445  | 1   | 124  | 0.72 | 0.79 |
| Arrayán en la Montosa           | 2513 | 216  | 0.4  | 50    | 8.1  | 1.6 | -1.15 | 560  | 18  | 207  | 0.75 | 0.63 |
| Yerba Loca antes de junta con   | 3424 | 110  | 0.2  | 70    | 3.3  | 1.2 | -1.13 | 456  | 72  | 278  | 0.75 | 0.44 |
| Maipo en el Manzano             | 3181 | 4839 | 0.2  | 69    | 5.0  | 0.9 | -1.12 | 764  | 59  | 605  | 0.81 | 0.35 |
| Claro en el Valle               | 1605 | 349  | 27.1 | 20    | 10.7 | 0.8 | -1.16 | 1297 | 1   | 702  | 0.63 | 0.59 |
| Claro en los Queñes             | 1857 | 354  | 14.6 | 36    | 8.9  | 0.6 | -1.11 | 1568 | 8   | 1527 | 0.70 | 0.41 |
| Colorado en junta con Palos     | 2288 | 878  | 11.5 | 57    | 7.1  | 0.5 | -1.09 | 1650 | 23  | 1526 | 0.73 | 0.38 |
| Palos en junta con Colorado     | 1973 | 490  | 16.7 | 55    | 8.1  | 0.5 | -1.07 | 1743 | 14  | 1532 | 0.80 | 0.32 |
| Sauces antes de junta con Ñuble | 1683 | 607  | 9.8  | 20    | 8.3  | 0.6 | -1.04 | 1752 | 10  | 1581 | 0.68 | 0.36 |

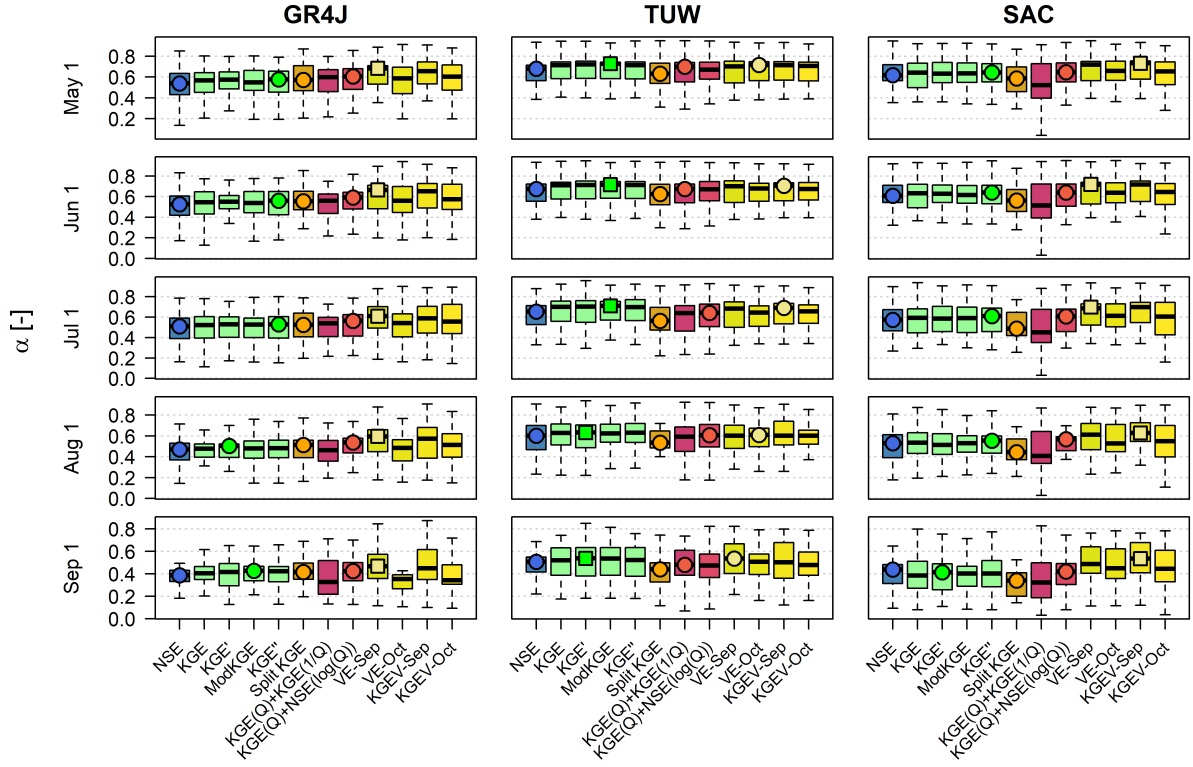

**Figure S1.** Comparison of  $\alpha$  reliability indices obtained with different calibration objective functions. Each panel contains results for a specific combination initialization time (rows) and hydrological model (columns), and each boxplot comprises results from the 22 case study basins. The boxes correspond to the interquartile range (IQR, i.e., 25<sup>th</sup> and 75<sup>th</sup> percentiles), the horizontal line in each box is the median, and whiskers extend to the  $\pm 1.5 \cdot IQR$  of the ensemble. The circle indicates the objective function providing the highest median within each family of calibration metrics (identified with different colors), and the square indicates the objective function that delivers the best set of metric values using a specific combination of initialization time and hydrological model.

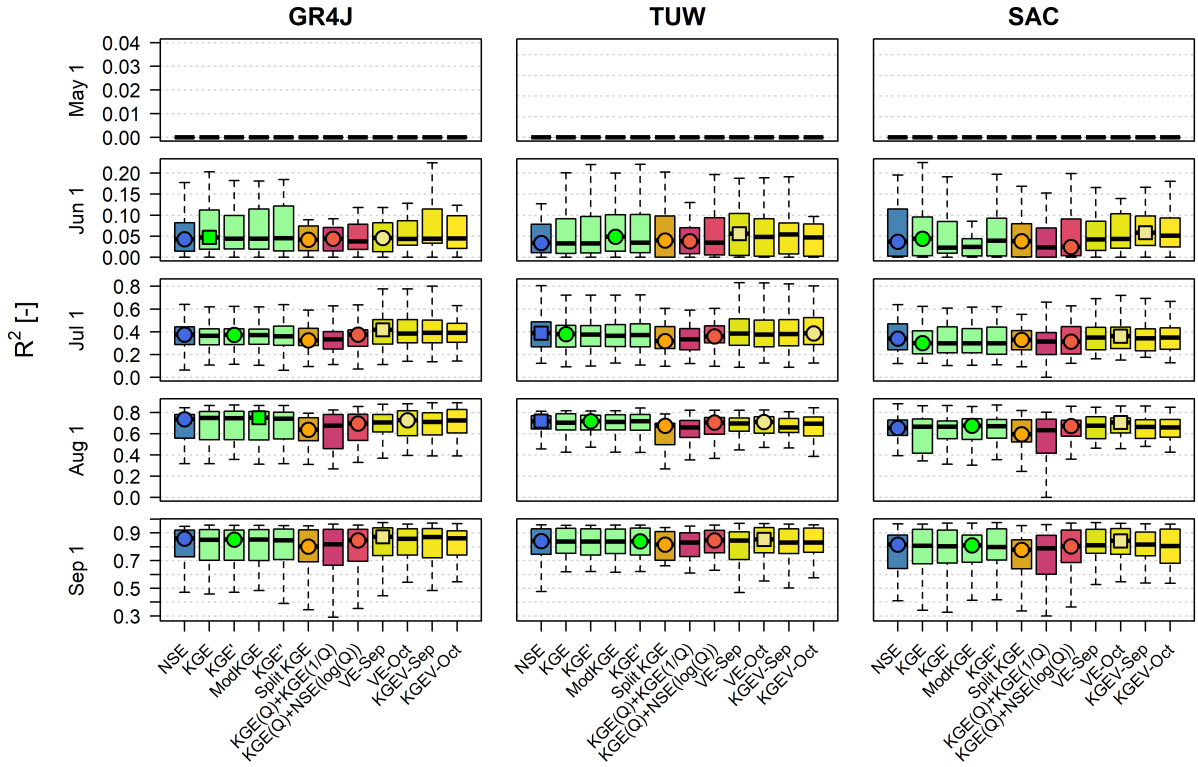

Figure S2. Same as in Figure S1, but for  $R^2$ .

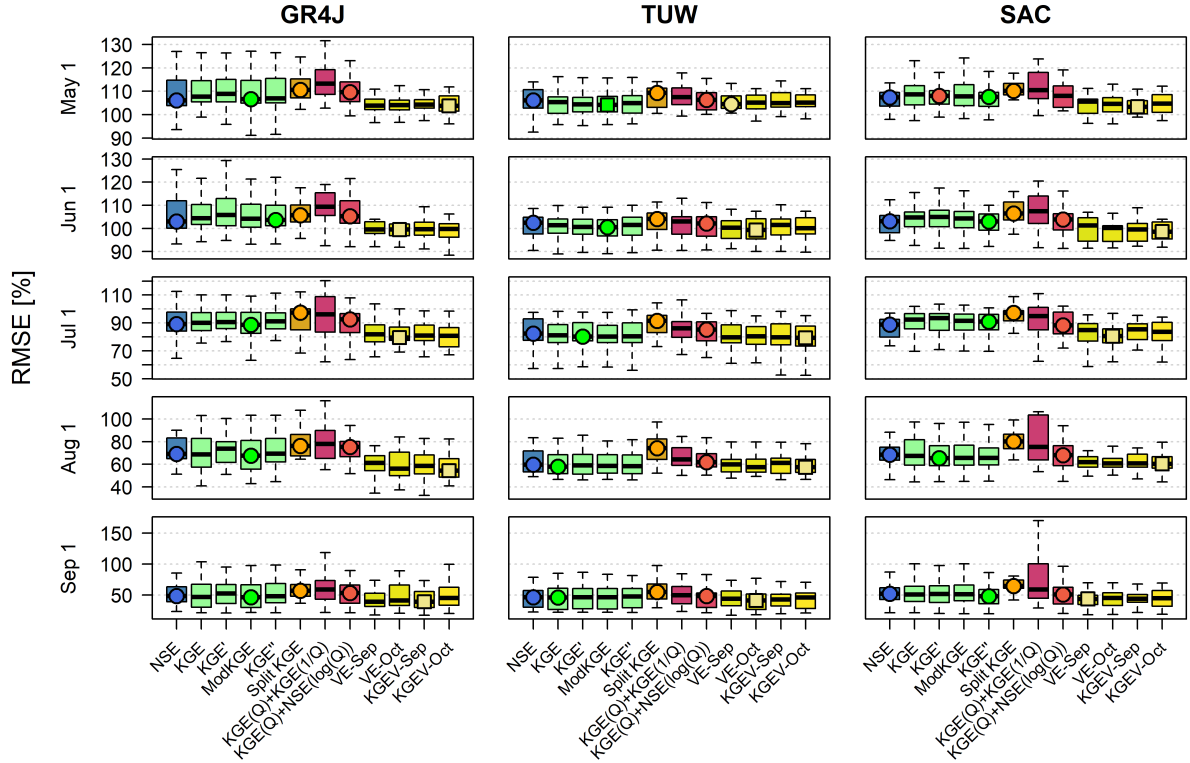

Figure S5. Same as in Figure S1, but for the root mean square error (RMSE) of the ensemble median.
